# Supplementary material for: Dietary Neuroketotherapeutics for Alzheimer’s Disease: An Evidence Update and the Potential Role for Diet Quality
Source: PubMed Central journal article supplement (PMC6722814; doi:10.3390/nu11081910), 2019-08-15
Supplement: nutrients-11-01910-s001.pdf [file nutrients-11-01910-s001.pdf]

**Table S1.** Summary of neuroketotherapeutic studies included in this review.

| Study                          | Country | Design           | Sample <sup>1</sup> | Diagnosis                 | Intervention                                         | Result                                                                                                                                                                                                                  |
|--------------------------------|---------|------------------|---------------------|---------------------------|------------------------------------------------------|-------------------------------------------------------------------------------------------------------------------------------------------------------------------------------------------------------------------------|
| <b><u>MCT Oil</u></b>          |         |                  |                     |                           |                                                      |                                                                                                                                                                                                                         |
| Reger (2004)                   | USA     | Crossover        | 20                  | Probable MCI or AD        | 1 dose of 40 mL MCT or placebo                       | Improved paragraph recall 90 minutes post-MCT. Better ADASCog with MCT vs. placebo at day 45.                                                                                                                           |
| Henderson (2009)               | USA     | RCT              | 152                 | Mild/Moderate AD          | 3 months of 20g MCT (C8) vs. placebo                 | ApoE4 negative individuals also had better ADASCog with MCT at day 90.                                                                                                                                                  |
| Maynard (2013)                 | USA     | Chart Review     | 55                  | Probable Mild/Moderate AD | Unspecified Axona dosage for 6+ months               | 79.5% of patients had stability or improvement over 18.8 month follow up.                                                                                                                                               |
| Farah (2014)                   | USA     | Case Report      | 1                   | Mild AD                   | 109 days of 20g MCT (C8)                             | 5-point improvement in MMSE and 4-point improvement in MoCA. No change in glucose uptake. Limited feasibility with high dropout and recruitment challenges.                                                             |
| Rebello (2015)                 | USA     | RCT              | 4                   | MCI                       | 24 weeks of 56g MCT (C8/C10) vs. placebo             | Global ADASCog scores improved in the ApoE4 negative patient and slightly worsened in the ApoE4 positive patient.                                                                                                       |
| Croteau (2018)                 | Canada  | Single-Arm Trial | 11                  | Possible/Probable AD      | 1 month of 30g MCT (C8/C10) vs. 30g MCT (C8)         | Increased cerebral ketone uptake (measured by PET) associated with both MCT formulations.                                                                                                                               |
| Torosyan (2018)                | USA     | RCT              | 16                  | MCI or AD                 | 45 days of Axona [20g MCT (C8)] vs. placebo          | No change in cerebral blood flow after 1 dose or at 45 days. Increased superior lateral temporal cortex blood flow in ApoE4 negative patients at day 45.                                                                |
| Ota (2019)                     | Japan   | Crossover        | 20                  | Mild to Moderate AD       | 1 dose of 20g MCT (C8/C10) or placebo                | No between group difference in cognitive performance 120 minutes post-administration of the MCT formulation or placebo.                                                                                                 |
| Ota (2019)                     | Japan   | Single-Arm Trial | 16                  | Mild to Moderate AD       | 12 weeks of 20g MCT (C8/C10)                         | Improvement from baseline in immediate and delayed logical memory tests at 8 weeks. Improvement from baseline in digit-symbol coding and immediate logical memory tests at week 12.                                     |
| Fortier (2019)                 | Canada  | RCT              | 38                  | MCI                       | 6 months of 30g MCT (C8/C10) vs. placebo             | 230% increase in cerebral ketone uptake (measured by PET) in MCT group. No change in cerebral glucose uptake. Multiple cognitive domain improvements in MCT group that positively correlated with plasma ketone levels. |
| <b><u>Exogenous Ketone</u></b> |         |                  |                     |                           |                                                      |                                                                                                                                                                                                                         |
| Newport (2015)                 | USA     | Case Report      | 1                   | Early Onset Sporadic AD   | 8 weeks of 28.7g ketone monoester 3x/day             | Acute elevation in serum BHB and observed improvement in recollection and function.                                                                                                                                     |
| <b><u>Coconut Oil</u></b>      |         |                  |                     |                           |                                                      |                                                                                                                                                                                                                         |
| Yang (2015)                    | Spain   | RCT              | 44                  | Institutionalized AD      | 21 days of 40mL extra virgin coconut oil vs. control | 4.5-point MEC-Lobo (validated Spanish cognitive test) improvement in coconut oil group. No cognitive change in control group.                                                                                           |

|                              |          |                  |    |                          |                                                                                       |                                                                                                                                                                                             |
|------------------------------|----------|------------------|----|--------------------------|---------------------------------------------------------------------------------------|---------------------------------------------------------------------------------------------------------------------------------------------------------------------------------------------|
| Chan (2017)                  | Malaysia | RCT              | 22 | Mild to Severe AD        | 6 months of 60mL cold pressed virgin coconut oil vs. placebo                          | High dropout as 40 participants were randomized and 18 withdrew (12 intervention, 6 control). No change in cognition in either group.                                                       |
| De la Rubia Ortí (2018)      | Spain    | RCT              | 44 | Institutionalized AD     | 21 days of Mediterranean diet plus 40mL coconut oil vs. Mediterranean diet alone      | The Mediterranean diet plus coconut oil group improved episodic memory, temporal orientation, and semantic memory relative to the Mediterranean diet group alone.                           |
| <b><u>Ketogenic Diet</u></b> |          |                  |    |                          |                                                                                       |                                                                                                                                                                                             |
| Krikorian (2012)             | USA      | RCT              | 23 | MCI                      | 6 weeks of carbohydrate restriction (<10% energy) vs. high carbohydrate (~50% energy) | Trace urinary ketone production. Verbal memory improvement in the carbohydrate restriction group that correlated with urine ketone levels.                                                  |
| Taylor (2018)                | USA      | Single-Arm Trial | 10 | Very Mild to Moderate AD | 3 months of well-formulated KD with MCT supplementation                               | 4.1-point improvement in ADASCog scores at end of intervention. Scores returned to baseline values after 1-month discontinuance of KD.                                                      |
| Brandt (2019)                | USA      | RCT              | 14 | MCI or AD                | 12 weeks of MAD vs. NIA diet for seniors                                              | MAD group had no change in global memory. Global memory worsened in NIA group. Ketosis-producing MAD participants had improved global memory at week 6 and no change between week 6 and 12. |

<sup>1</sup>Sample number reflects the sample size included in data analysis Abbreviations: AD, Alzheimer's disease; ADASCog, Alzheimer's Disease Assessment Scale Cognitive Subscale; BHB, beta-hydroxybutyrate; KD, ketogenic diet; MAD, Modified Atkins Diet; MCI, mild cognitive impairment; MCT, medium-chain triglyceride; MMSE, Mini-Mental State Examination; MoCA, Montreal Cognitive Assessment; NIA, National Institutes on Aging; RCT, randomized controlled trial.
